# Supplementary material for: The Oral and Skin Microbiomes of Captive Komodo Dragons Are Significantly Shared with Their Habitat
Source: PubMed Central journal article supplement (PMC5069958; doi:10.1128/msystems.00046-16), 2016-08-02

**A.** Denver Zoo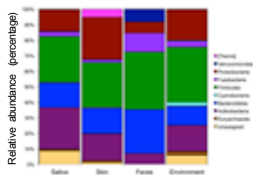**B.** Honolulu Zoo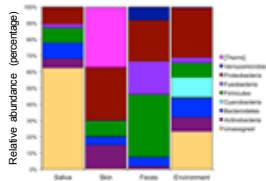**C.** Denver Zoo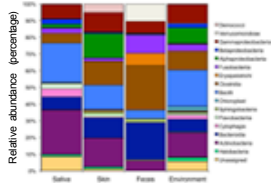**D.** Honolulu Zoo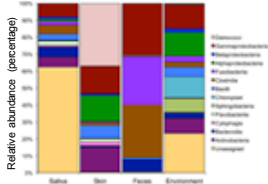**E.** Denver Zoo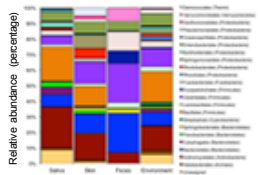**F.** Honolulu Zoo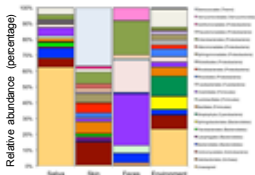**G.** Denver Zoo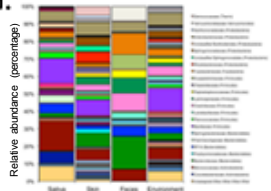**H.** Honolulu Zoo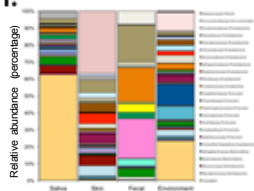

Supplement: sys004162043sf2.pdf [file sys004162043sf2.pdf]
