# Supplementary material for: The Oral and Skin Microbiomes of Captive Komodo Dragons Are Significantly Shared with Their Habitat
Source: PubMed Central journal article supplement (PMC5069958; doi:10.1128/msystems.00046-16), 2016-08-02

**A.**

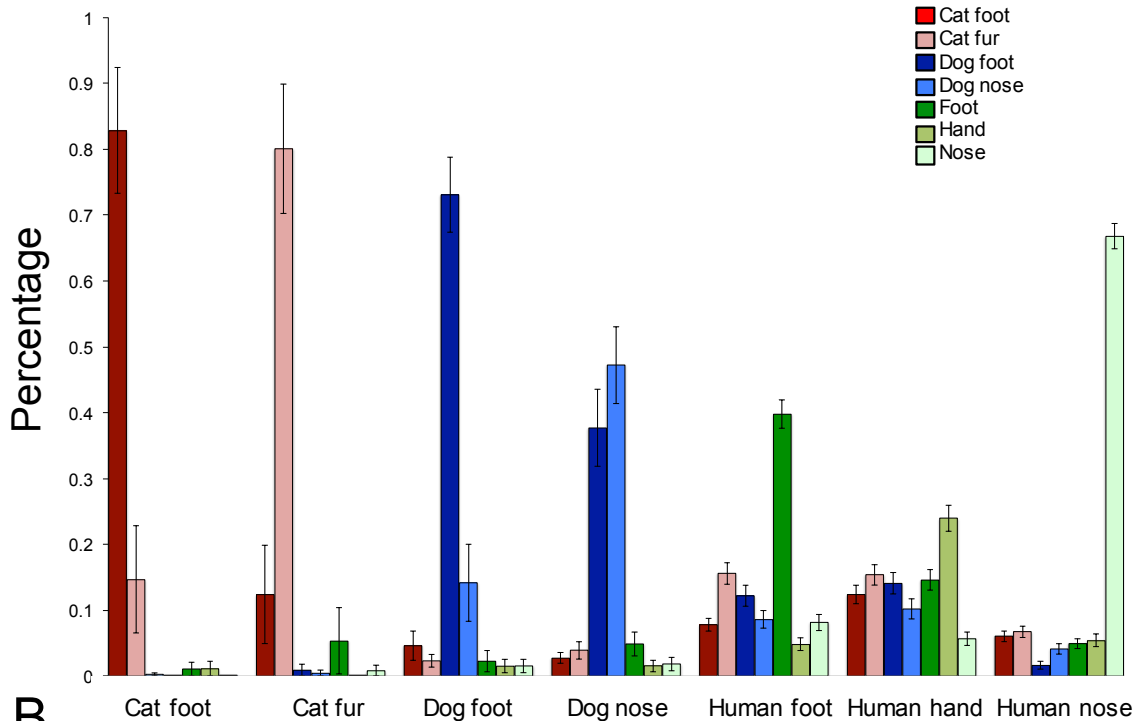

**B.**

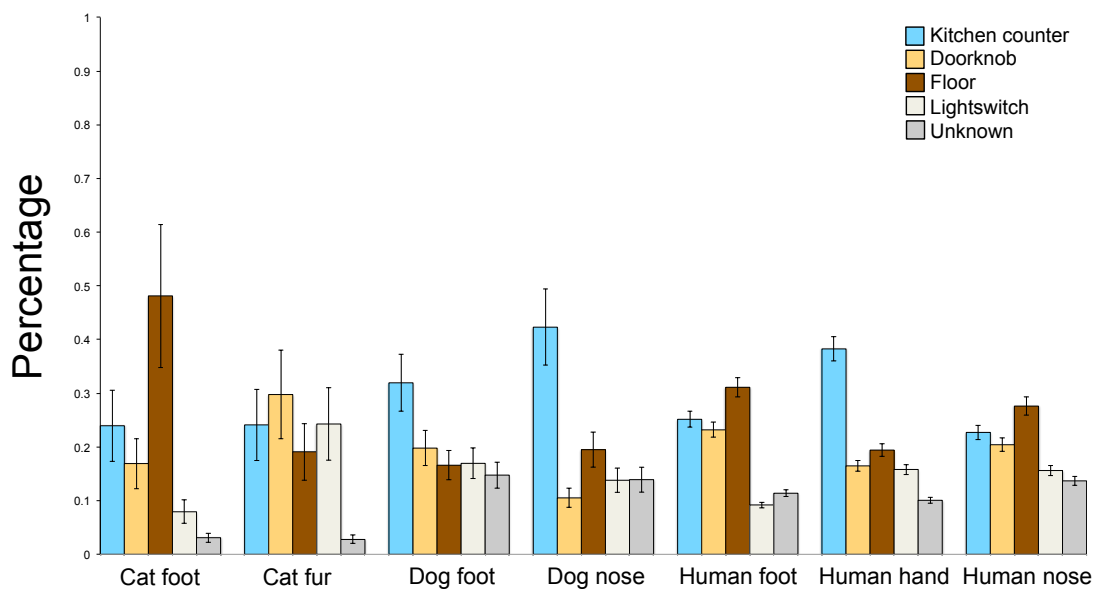

Supplement: sys004162043sf4.pdf [file sys004162043sf4.pdf]
